# Supplementary material for: Phenolic Profile, Antioxidant and Enzyme Inhibition Properties of the Chilean Endemic Plant Ovidia pillopillo (Gay) Meissner (Thymelaeaceae)
Source: MDPI journal article supplement (doi:10.3390/metabo12020090), 2022-01-18

# Phenolic Profile, Antioxidant and Enzyme Inhibition Properties of the Chilean Endemic Plant *Ovidia pillopillo* (Gay) Meissner (Thymelaeaceae)

Carmen Cortés <sup>1,†</sup>, Diego A. González-Cabrera <sup>1,†</sup>, Ruth Barrientos <sup>1</sup>, Claudio Parra <sup>2</sup>, Javier Romero-Parra <sup>3</sup>, Mariano Walter Pertino <sup>4,\*</sup>, Carlos Areche <sup>5</sup>, Beatriz Sepúlveda <sup>6</sup>, Jorge Bórquez <sup>7</sup>, Alfredo Torres-Benítez <sup>1</sup> and Mario J. Simiriotis <sup>1,\*</sup>

**Citation:** Cortés, C.;

González-Cabrera, D.; Barrientos, R.; Parra, C.; Romero Parra, J.; Pertino, M.W.; Areche, C.; Sepúlveda, B.; Bórquez, J.; Torres-Benítez, A.; et al. Phenolic Profile, Antioxidant and Enzyme Inhibition Properties of the Chilean Endemic Plant *Ovidia pillopillo* (Gay) Meissner (Thymelaeaceae). *Metabolites* **2022**, *11*, 90. <https://doi.org/10.3390/12020090>

Academic Editor: Gabriele Capodaglio

Received: 6 December 2021

Accepted: 17 January 2022

Published: 18 January 2022

**Publisher's Note:** MDPI stays neutral with regard to jurisdictional claims in published maps and institutional affiliations.

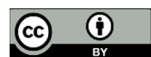

**Copyright:** © 2022 by the authors. Submitted for possible open access publication under the terms and conditions of the Creative Commons Attribution (CC BY) license (<https://creativecommons.org/licenses/by/4.0/>).

- <sup>1</sup> Instituto de Farmacia, Facultad de Ciencias, Campus Isla Teja, Universidad Austral de Chile, Valdivia 5090000, Chile; carmenc1012@gmail.com (C.C.); diego.gonzalez@alumnos.uach.cl (D.A.G.-C.); ruth.barrientos@alumnos.uach.cl (R.B.); aljotobe19@hotmail.com (A.T.-B.)
  - <sup>2</sup> Laboratorio de Química Orgánica y Productos Naturales, Facultad de Ciencias Agronómicas, Universidad de Tarapacá, Av. General Velásquez 1775, Arica 1000000, Chile; cparra@uta.cl
  - <sup>3</sup> Departamento de Química Orgánica y Fisicoquímica, Facultad de Ciencias Químicas y Farmacéuticas, Universidad de Chile, Olivos 1007, Casilla 233, Santiago 6640022, Chile; javier.romero@ciq.uchile.cl
  - <sup>4</sup> Laboratorio de Química de Productos Naturales, Instituto de Química de Recursos Naturales, Universidad de Talca, Talca 3460000, Chile
  - <sup>5</sup> Departamento de Química, Facultad de Ciencias, Universidad de Chile, Las Palmeras 3425, Nuñoa, Santiago 7800024, Chile; areche@uchile.cl
  - <sup>6</sup> Departamento de Ciencias Químicas, Universidad Andres Bello, Campus Viña del Mar, Quillota 980, Viña del Mar 2520000, Chile; bsepulveda@uc.cl
  - <sup>7</sup> Departamento de Química, Facultad de Ciencias Básicas, Universidad de Antofagasta, Antofagasta 1240000, Chile; jorge.borquez@uantof.cl
- \* Correspondence: mwalter@utalca.cl (M.W.P.); mario.simiriotis@uach.cl (M.J.S.); Tel.: +56-999835427 (M.J.S.)
- † These authors contributed equally to this work.

**Figure S1: (a–e)** Full MS spectra and structures of compounds detected in *O. pillo- pillo* tincture (peaks 10, 13, 14, 15 and 17).

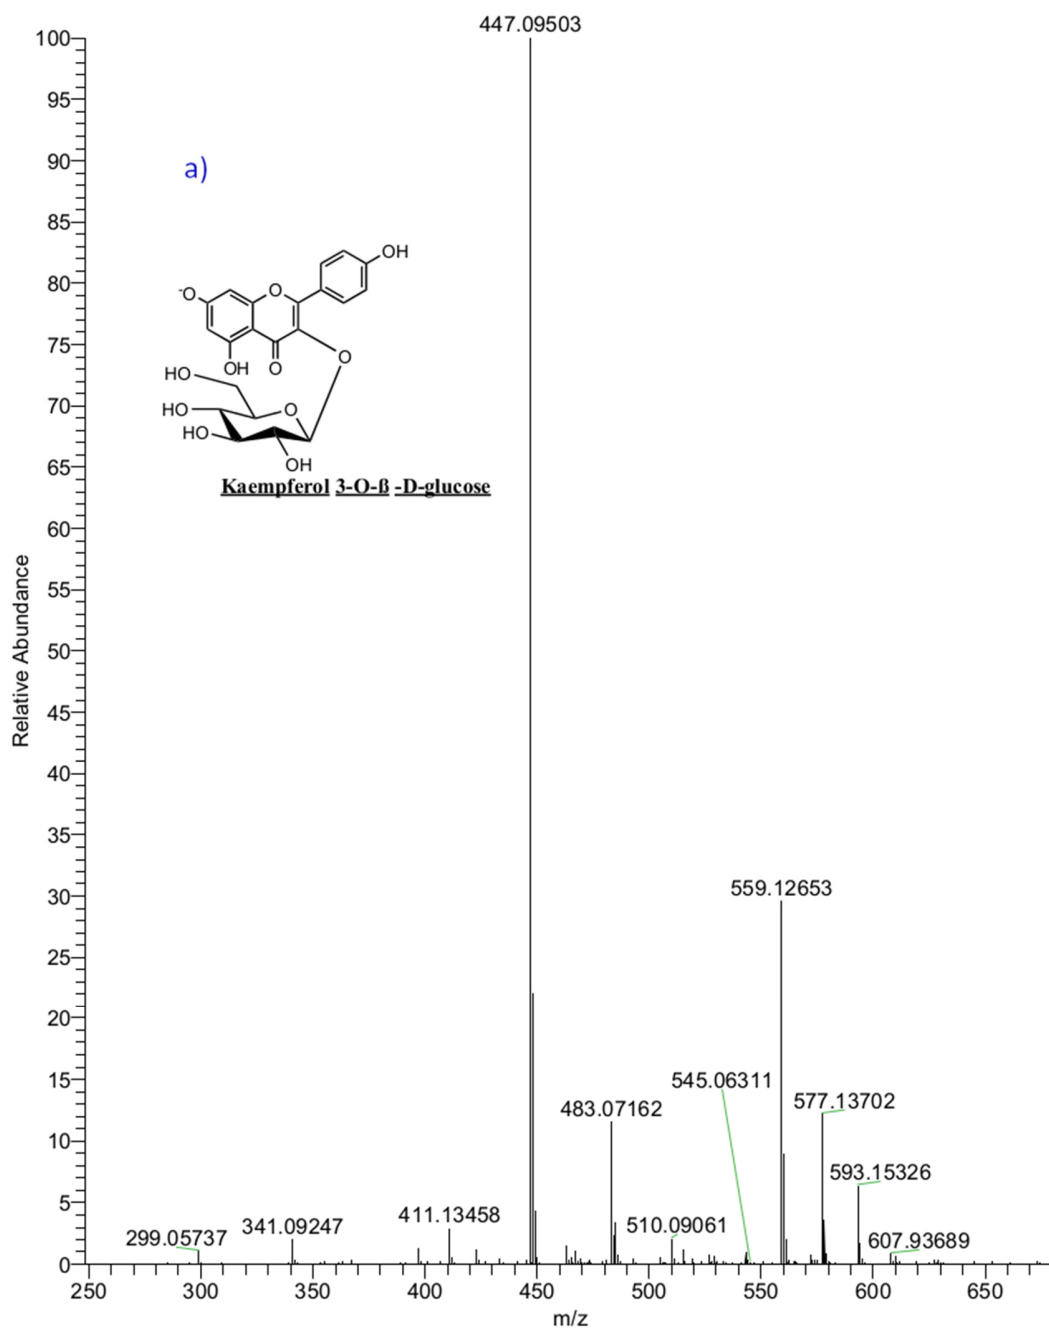

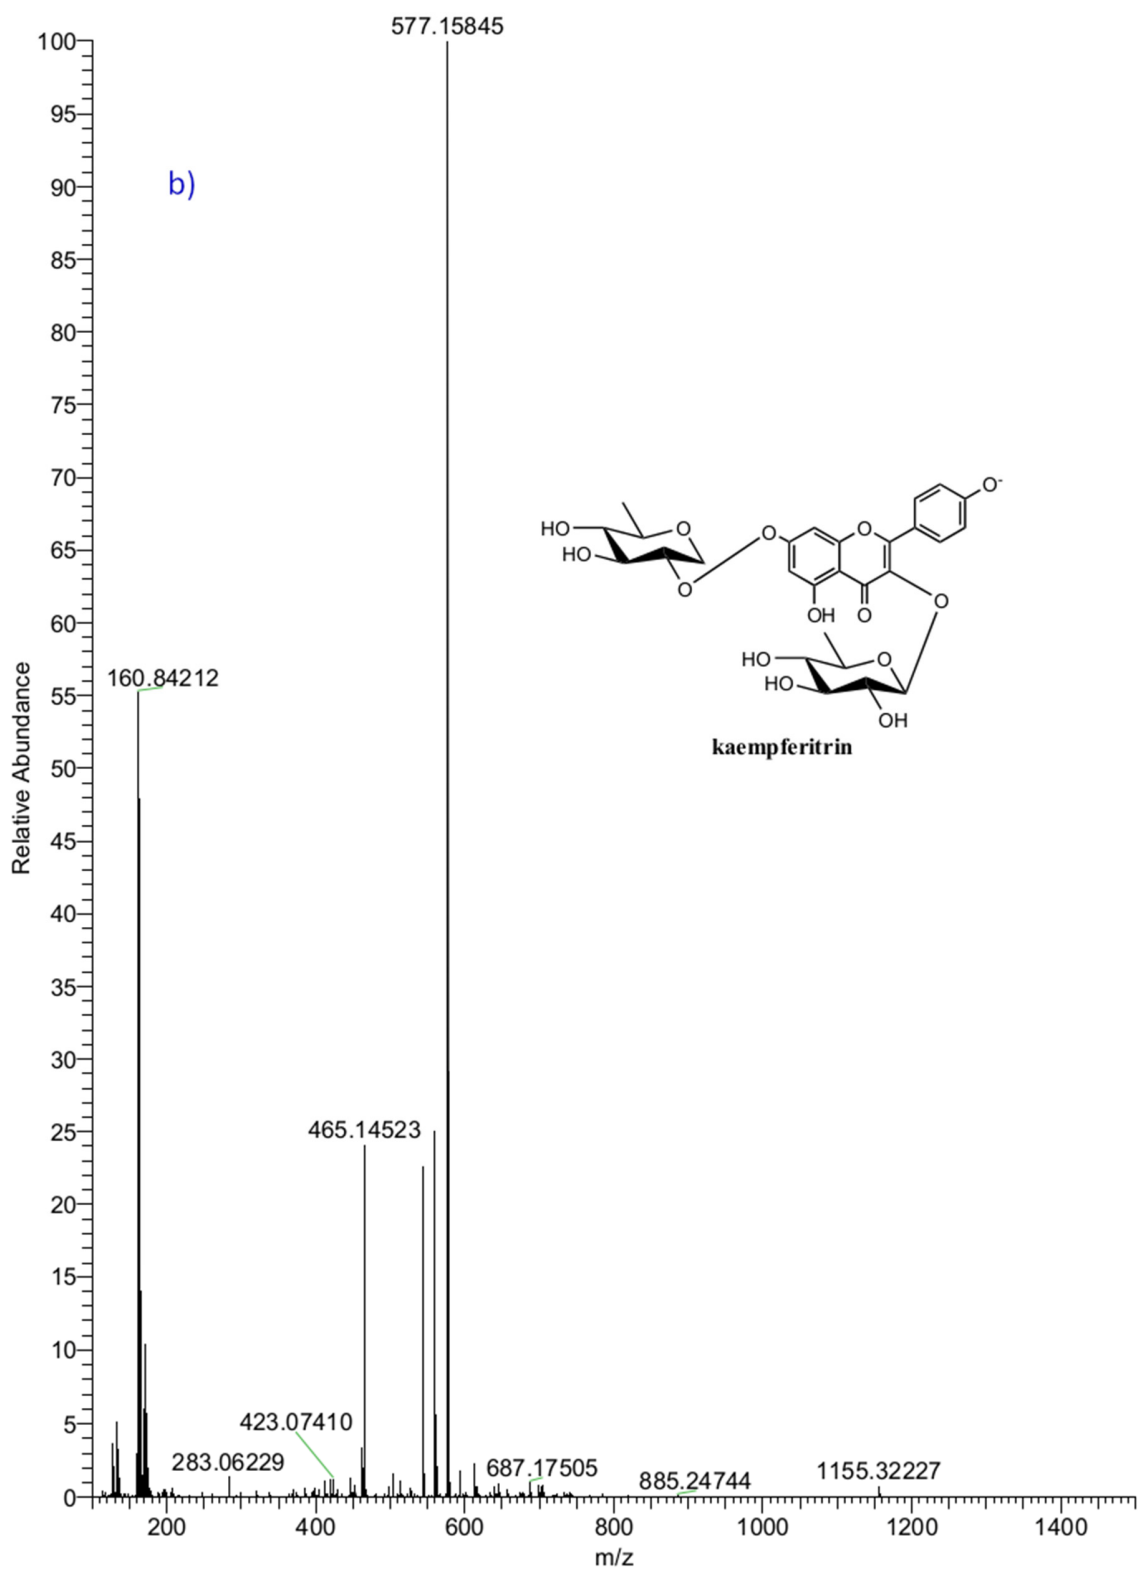

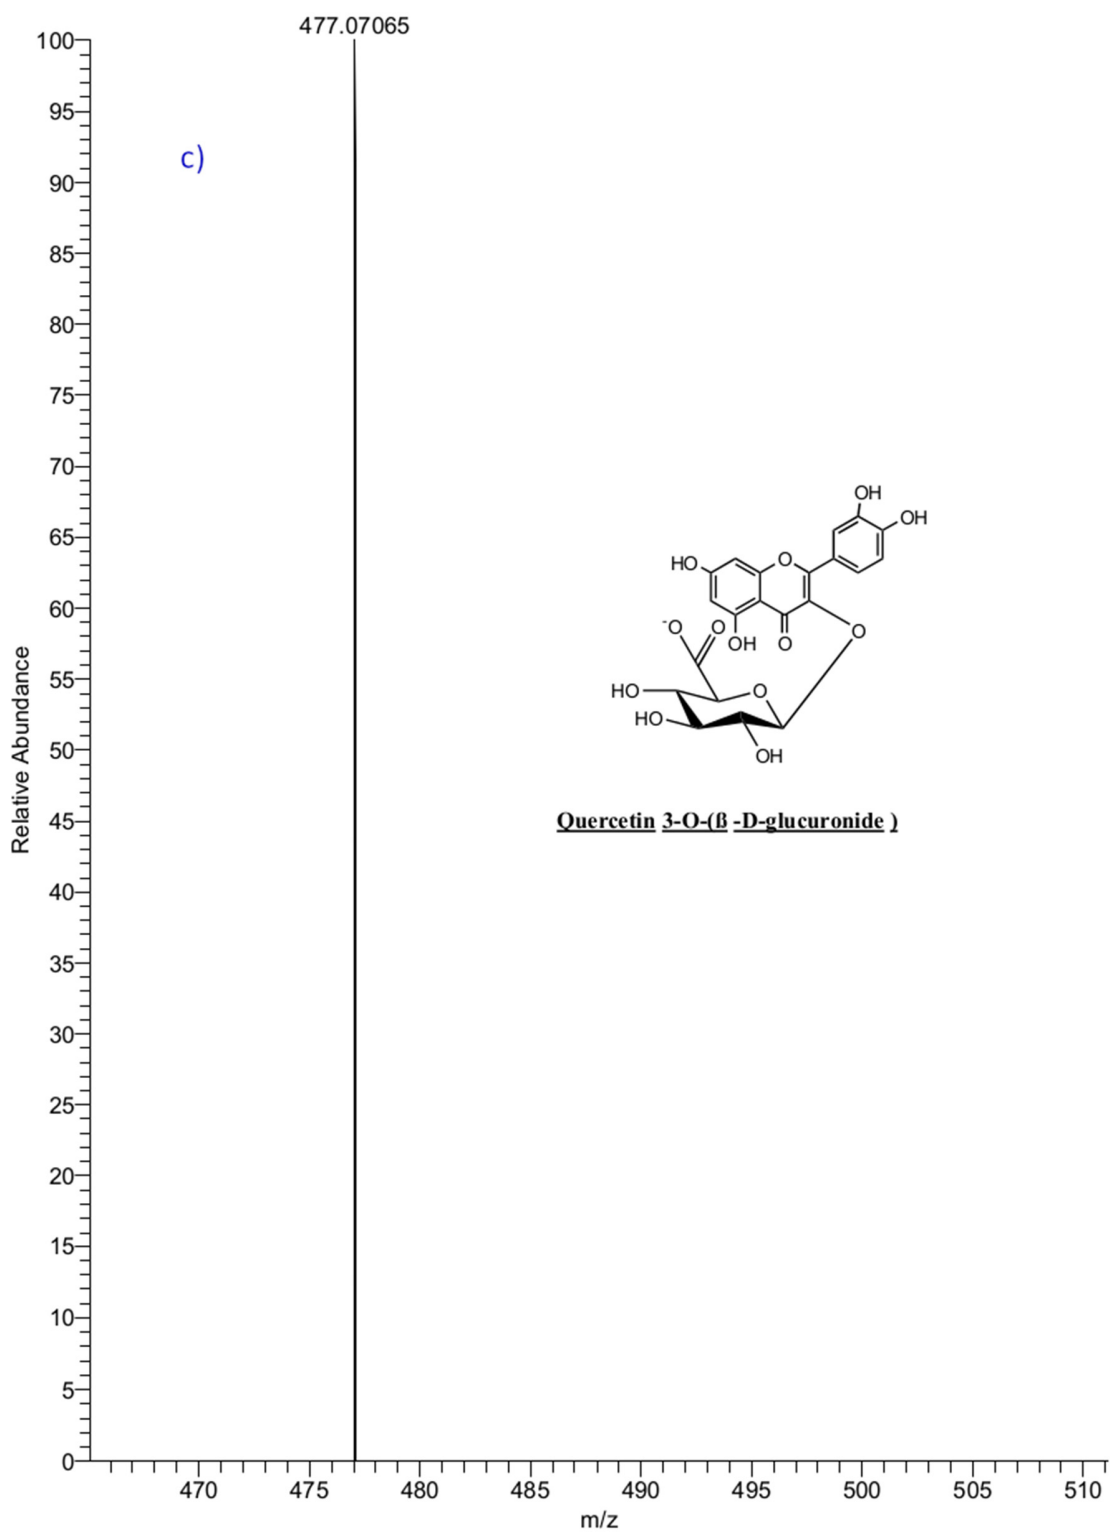

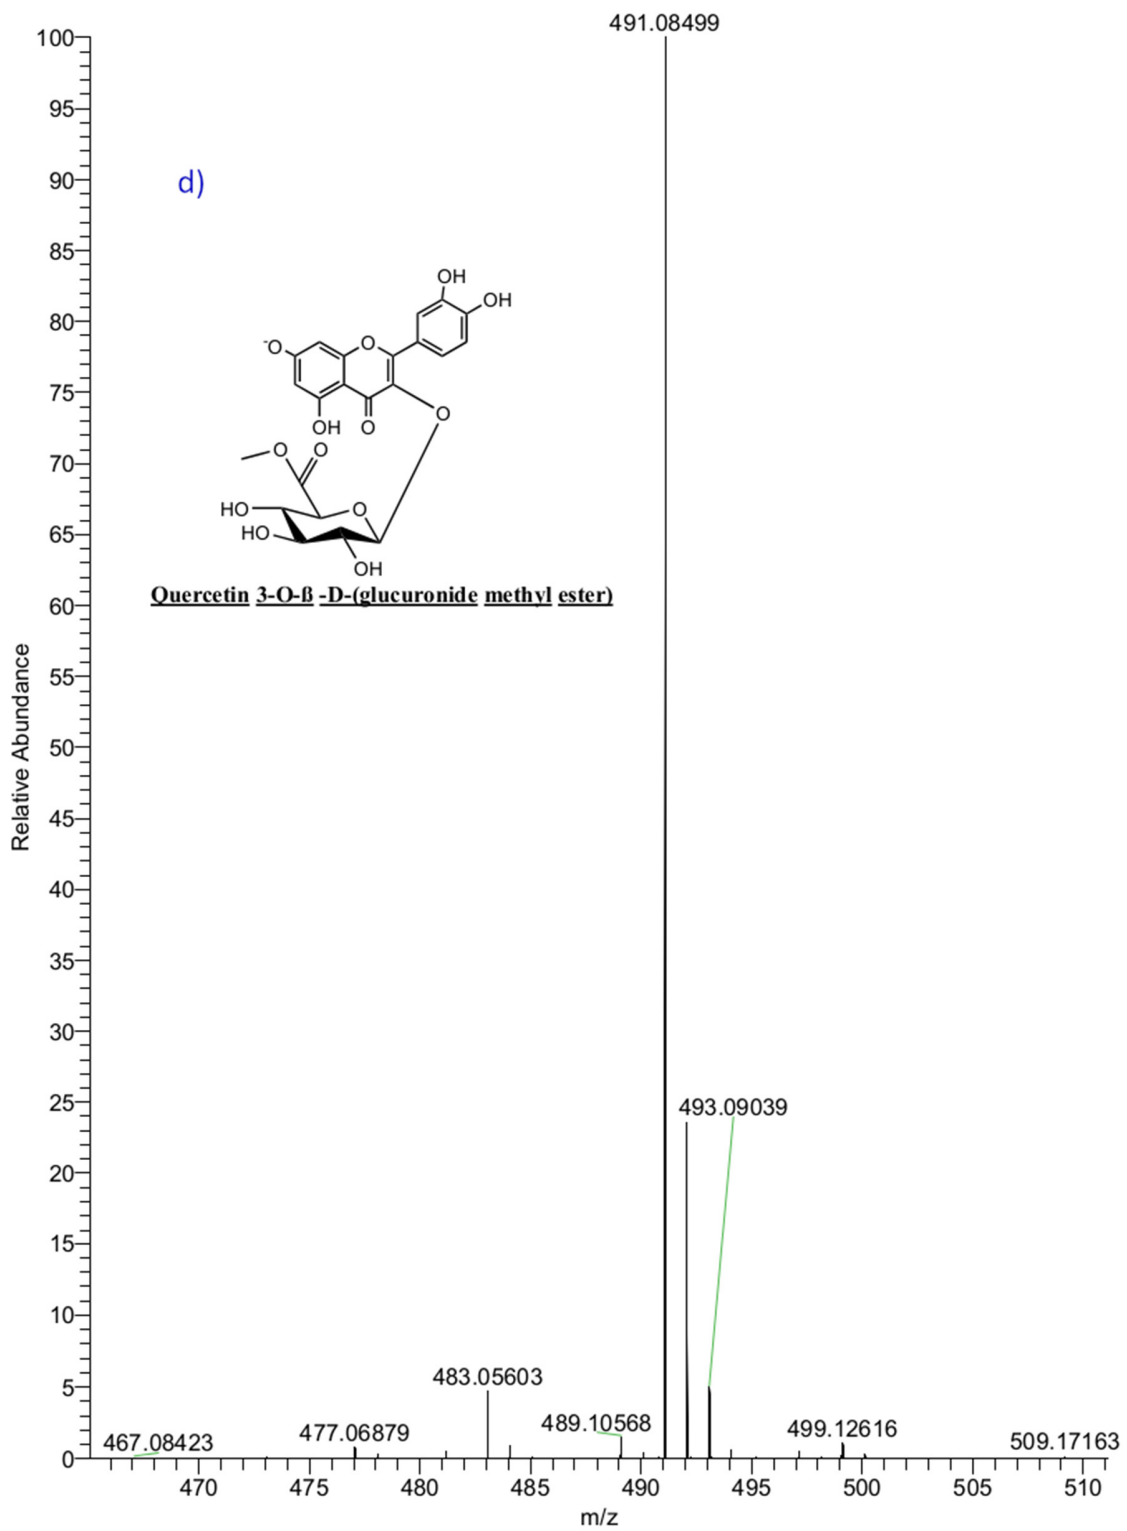

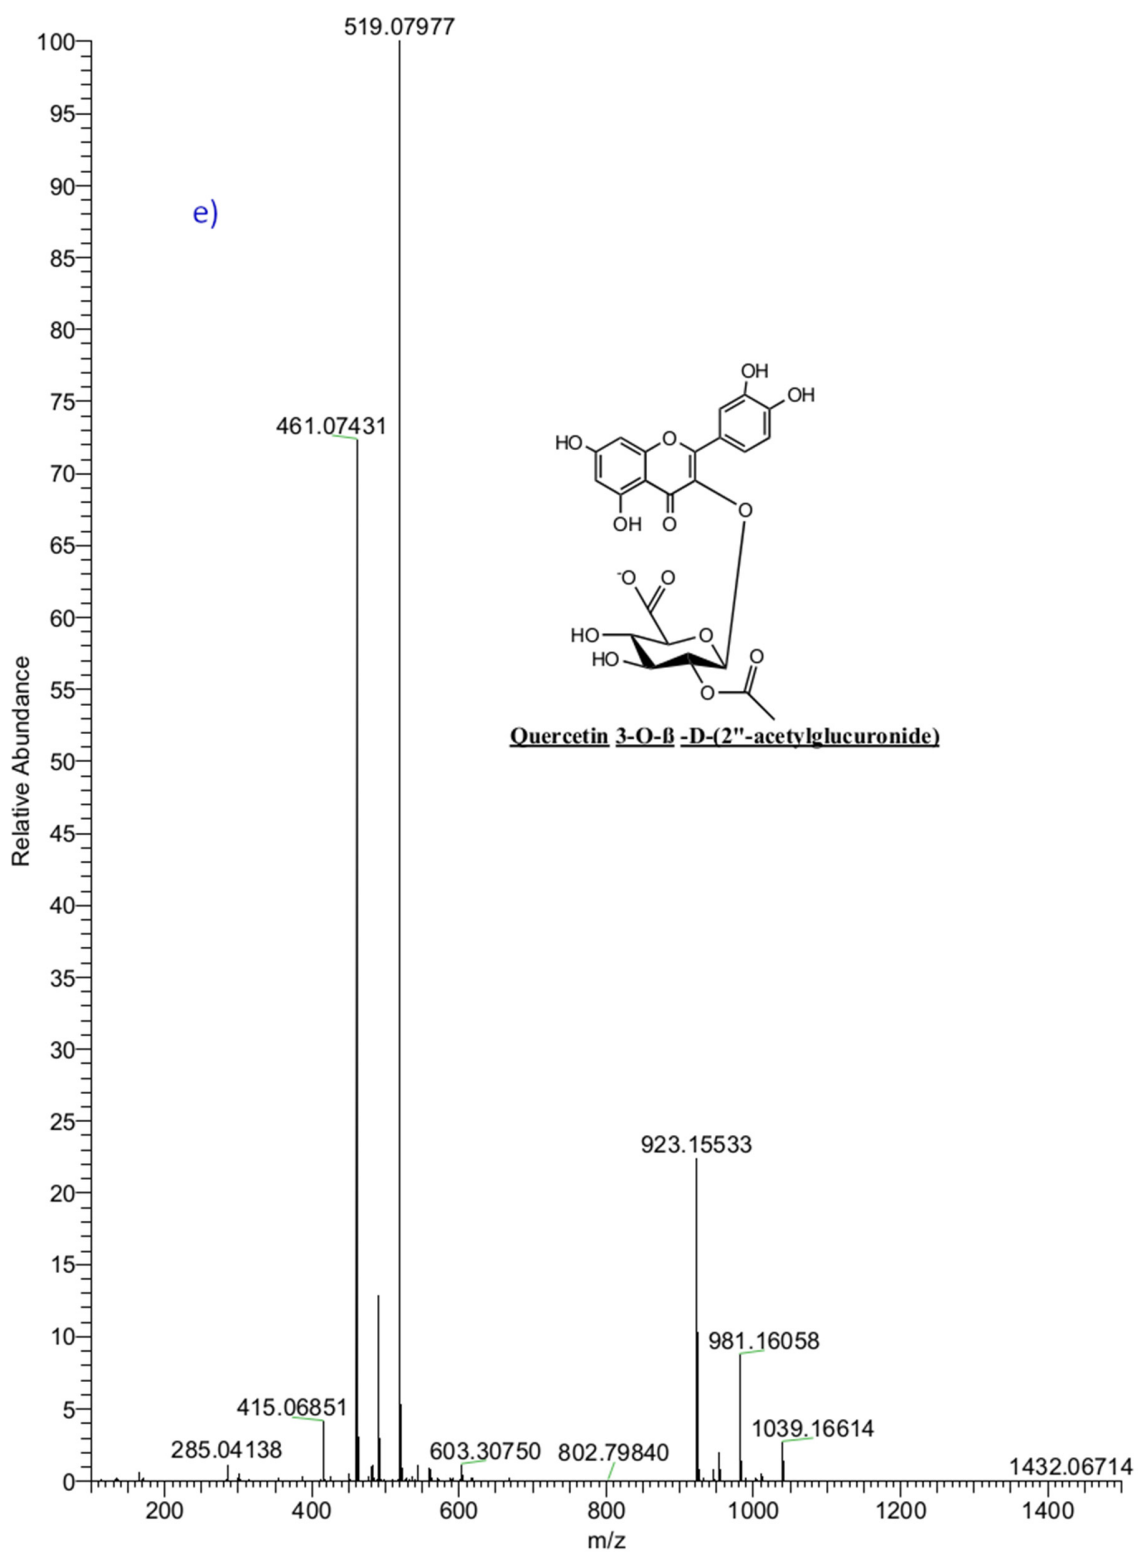

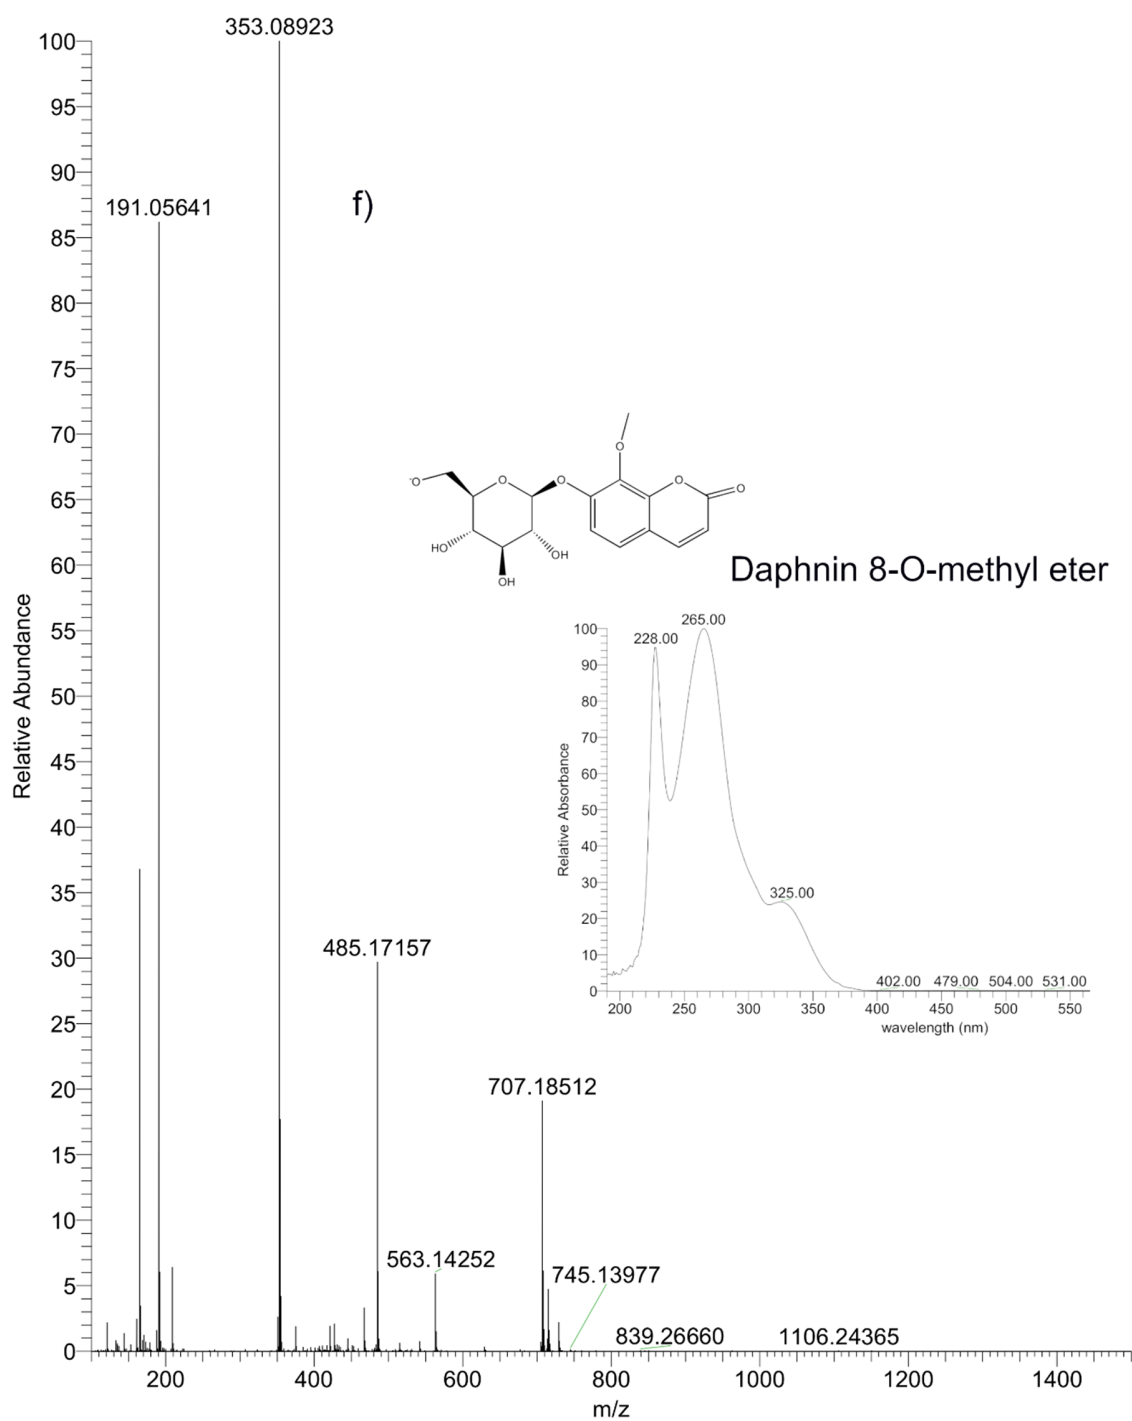

Supplement: s1 [file s1]
